STUDY PROTOCOL

# Age-related experiences of diverse older women living with HIV: A scoping review protocol informed by intersectionality

Kristina Kokorelias<sup>1,2,3,4,\*</sup>, Paige Brown<sup>1,5</sup>, Sharon Walmsley<sup>6,7,8</sup>, Alice Zhabokritsky<sup>6,7,8</sup>, Esther Su<sup>1</sup>, Luxey Sirisegaram<sup>1</sup>

**1** Division of Geriatric Medicine, Department of Medicine, Sinai Health System and University Health Network, Toronto, ON, Canada, **2** Department of Occupational Science and Occupational Therapy, Temerty Faculty of Medicine, University of Toronto, Toronto, ON, Canada, **3** National Institute on Ageing, Toronto Metropolitan University, Toronto, ON, Canada, **4** Rehabilitation Sciences Institute, Temerty Faculty of Medicine, University of Toronto, Toronto, ON, Canada, **5** Undergraduate Medical Education, Temerty Faculty of Medicine, University of Toronto, Toronto, ON, Canada, **6** Infectious Diseases, Department of Medicine, University Health Network, Toronto, ON, Canada, **7** Division of Infectious Diseases, Department of Medicine, University of Toronto, Toronto, ON, Canada, **8** CIHR Canadian HIV Trials Network, Vancouver, BC, Canada

\* [k.kokorelias@utoronto.ca](mailto:k.kokorelias@utoronto.ca)

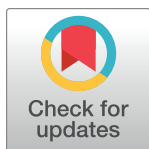

## OPEN ACCESS

**Citation:** Kokorelias K, Brown P, Walmsley S, Zhabokritsky A, Su E, Sirisegaram L (2024) Age-related experiences of diverse older women living with HIV: A scoping review protocol informed by intersectionality. PLoS ONE 19(6): e0306225. <https://doi.org/10.1371/journal.pone.0306225>

**Editor:** Wen-Jun Tu, Chinese Academy of Medical Sciences and Peking Union Medical College, CHINA

**Received:** November 29, 2023

**Accepted:** June 11, 2024

**Published:** June 26, 2024

**Copyright:** © 2024 Kokorelias et al. This is an open access article distributed under the terms of the [Creative Commons Attribution License](https://creativecommons.org/licenses/by/4.0/), which permits unrestricted use, distribution, and reproduction in any medium, provided the original author and source are credited.

**Data Availability Statement:** No datasets were generated or analysed during the current study. All relevant data from this study will be made available upon study completion.

**Funding:** This research was supported by the AGE-WELL Network of Centres of Excellence (NCE) (AW-CAT-2023-03) Inc and the Canadian Frailty Network's (CFN) Catalyst Funding Program in Healthy Aging. The AGE-WELL NCE and CFN are funded by the Government of Canada through the

## Abstract

### Introduction

Older women living with HIV often go unnoticed due to societal biases and stigmas. Despite a rise in cases among older women, there is limited research on the psychosocial factors impacting their experiences. Aging complexities compounded by HIV and menopause affect these women's health, while factors like mental health impact, changing support networks, and ageism with HIV stigma influence their well-being. Existing studies mostly compare older HIV-positive individuals without considering gender and intersectional identities, limiting understanding of their unique experiences. The scarcity of research addressing age-related differences from diverse perspectives delays the development of tailored treatments and interventions.

### Objectives

The study aims to comprehensively explore the age-related experiences of older women with HIV through three sub-questions that address (1) Key experiences, medical and social challenges, and strengths; (2) Impact of intersectional identities on their experiences; and (3) Gaps and limitations in current research.

### Methods

Utilizing a scoping review approach, the study seeks to map existing literature, employing a theoretical framework rooted in Sex- and Gender-Based Analysis Plus (SGBA+). Articles focusing on the age-related experiences of older women living with HIV aged 50 and above will be included. The study selection process will involve two independent reviewers

Networks of Centres of Excellence program. There was no additional external funding received for this study.

**Competing interests:** The authors have declared that no competing interests exist.

screening articles based on pre-established inclusion criteria. Data extraction and synthesis will follow, analyzing the influence of sex, gender, and other identities on experiences.

## Discussion

The study's comprehensive approach aims to bridge gaps in understanding older women's HIV experiences, emphasizing intersectionality. While limited to English-language peer-reviewed articles, this review seeks to offer valuable insights for healthcare, policy, and research, potentially fostering positive change in the lives of diverse older women living with HIV.

## Introduction

Human Immunodeficiency Virus (HIV) is an infection which is often overlooked in populations of individuals who are 50 years of age or older [1]. This population may be overlooked due to societal bias surrounding aging, and HIV stigma for older adults [2–5]. According to the Public Health Agency of Canada, there have been 1,472 new HIV cases diagnosed in Canada alone in 2021, with women who are older adults comprising 17.6% of these cases [6]. Although there has been an increase in the number of older women living with HIV (for purposes of this paper, defined as women aged over the age of 50), there has been limited research focusing on the psychosocial factors that are associated with aging and living with HIV [7]. As such, the intersection of aging and HIV is a critical issue that necessitates a deeper understanding to better address the complex needs of older women living with HIV [1, 7–9].

The age-related experiences of older women living with HIV are often complicated by concurrent chronic health issues linked to the aging process and features of menopause [1, 10–14]. Additionally, the psychosocial well-being of older women living with HIV is influenced by factors such as the impact of HIV on mental health [15], changes in social support networks [16, 17] and relationships as women grow older [18, 19], and the intersection of ageism and HIV-related stigma [20, 21]. These factors collectively affect older women living with HIV's subjective quality of life and overall well-being [22–24]. A scoping review on HIV, aging and health revealed that most of the existing literature involves the comparison of older individuals living with HIV to both younger individuals and those who were HIV-negative [25]. Additionally, the majority of the studies focus on individual experiences, regardless of gender [25]. While comparative studies are warranted, these comparisons may not be able to discern the unique role gender and other intersectional identities play in influencing age-related experiences of older women living with HIV. In response to this need, a scoping review explored the behavioral and psychosocial aspects of aging for older women living with HIV but noted little research examining age-related differences stemming from women's race/ethnicity, socioeconomic status, sexual identity, and urban or rural location [7]. Consequently, this scarcity of research has led to delays in developing targeted treatment options and customized prevention and intervention programs for older women living with HIV [5].

Systemic factors such as sexism, racism, and poverty play a significant role in contributing to stigmatized identities among older women living with HIV [4, 5, 26]. These systemic factors intersect and reinforce one another, contributing to the formation of stigmatized identities and exacerbating the psychosocial challenges experienced by older women living with HIV. Sexism, entrenched within societal norms and structures, perpetuates the face double discrimination women living with HIV often face due to both their gender and HIV status [27]. This

double discrimination often results in reduced health-seeking behaviours and missed medical appointments [28, 29]. Additionally, racism exacerbates the stigma experienced by women of colour living with HIV, compounding the effects of discrimination and marginalization [29, 30], and increasing risk of depression [31]. Furthermore, poverty serves as a systemic barrier to healthcare, education, and social support networks for older women with HIV, thereby exacerbating the challenges they face in navigating their daily lives [32, 33].

An intersectional perspective recognizes that various factors can significantly impact the experiences of older adults, which is not always addressed in existing reviews. For example, the Durvasula (2014) [5] adopts a more traditional literature review approach, focusing solely on summarizing and synthesizing existing literature on HIV/AIDS in older women without consideration of their intersectional identities that influence the age-related experiences of older women living with HIV, including psychosocial challenges, intersectional identities, and existing research gaps identified in the literature. Intersectionality offers a vital framework to comprehend the interconnected identities and experiences of individuals [34]. Over the past three decades, intersectionality has gained prominence in diverse academic disciplines, particularly in feminist scholarship [35, 36]. Intersectionality underscores the significance of not approaching issues through a single-issue lens, emphasizing the intricate web of identities that profoundly affect individuals' access to resources, their exclusion from social justice and political movements, and their day-to-day interactions [37–39].

In the context of older women living with HIV, it is crucial to recognize that the intersections of individual's identities significantly influence their experiences, both in terms of privilege and discrimination [40, 41]. For instance, the needs and challenges faced by women of color living with HIV differ from those of other groups [42, 43]. Moreover, the intersectionality of aging with HIV as a female urges us to consider the multifaceted nature of stigmatized identities (i.e., being a woman, living with HIV, ageism) [44]. A systematic review of existing reviews explored the intersectionality between HIV/AIDS, mental illness, and physical disability, but did not focus on older adults or women [44]. Therefore, to develop a comprehensive model for understanding how older women living with HIV, particularly those who may have multiple intersecting identities, navigate the health and social care system and their overall aging health, we must consider the complex interactions and challenges they face. This approach enables a more nuanced and holistic understanding of their experiences and informs more tailored and effective healthcare and support services.

## Objectives

In our endeavor to comprehensively explore the age-related experiences of older women living with HIV, we aim to answer the primary question of: What is the extent of the existing literature on the age-related experiences of older women living with HIV? To best address this we will answer three sub-questions:

1. What are the key experiences, medical and social challenges (e.g., comorbidity, stigma), and strengths of older women living with HIV (older women living with HIV)?;
2. How do intersectional identities (e.g., race, ethnicity, socio-economic status) impact the described experiences of older women with HIV?; and
3. What gaps and limitations exist in the current research related to older women living with HIV?

For the purpose of this study age-related experiences are defined broadly to include how the aging process interacts with HIV to influence health conditions, such as the increased risk

of chronic illnesses or cognitive changes; the psychosocial well-being of older women, including the impact of HIV on mental health; shifts in social support networks and relationships as women grow older; the intersection of ageism and HIV-related stigma; barriers and facilitators related to healthcare access and quality of care as women age; the subjective quality of life and overall well-being in light of the aging process and living with HIV; sexual and reproductive health considerations specific to older age; and the availability and utilization of support services tailored to the unique needs of older women living with HIV.

This research encourages a shift toward more holistic, patient-centric, and evidence-based approaches, ultimately improving the well-being and healthcare outcomes of older women living with HIV. For healthcare providers, a deeper understanding of the multifaceted challenges faced by older women living with HIV can inform tailored and effective care. By recognizing the impact of intersectional identities and social determinants, providers can better address disparities and deliver patient-centered care. Policymakers can use the findings to inform and shape policies that promote equitable healthcare access, reduce stigma, and enhance support services for older women living with HIV. Additionally, researchers benefit from this study by gaining a foundation for future investigations that address identified gaps and limitations.

## Methods

### Design

A Scoping Review (ScR) has been deemed the most appropriate approach to address our research questions because it serves as a form of knowledge synthesis that is specifically designed to explore and map key concepts, various types of evidence, and research gaps within a defined area of study or clinical practice [45]. This is achieved through a systematic process of searching, selecting, and synthesizing existing knowledge [46]. ScRs have the advantage of encompassing diverse study types [46]. In our study, we will adhere to the ScR methodology framework originally outlined by Arksey and O'Malley [46] and subsequently refined by Levac et al. [47], Colquhoun et al. [48] and Peters et al. [49]. Additionally, we will follow the Preferred Reporting Items for Systematic Review and Meta-Analysis Protocols extension for ScRs statement, which provides guidelines for reporting ScRs effectively [50]. This protocol was also registered with Open Science Framework (Blinded for Review).

### Theoretical frameworks

As with other reviews involving older adults [51], we will adopt a theoretical framework rooted in the principles of Sex- and Gender-Based Analysis Plus (SGBA+) [52, 53]. SGBA+ was selected as it involves intersectionality frameworks and can therefore facilitate a nuanced examination of sample characteristics within the research processes and data, encompassing biological sex and the multiple social dimensions that older adults embody, such as ethnicity, income, age, race, education, and gender [51, 54, 55]. In the context of this review, women are defined based on the distinction between sex and gender. Sex refers to the biological construct and categorization of individuals as female, typically based on physical and physiological characteristics [51]. Gender encompasses the socially ascribed dimensions related to being female or male, taking into account the roles, expectations, and cultural attributes assigned to individuals within a specific society or culture [51]. Therefore, women in this context are individuals who are biologically categorized at birth as female (sex) and who identify with the social construct and roles associated with being women (gender).

**Step 1: Research question.** The previously outlined research questions were developed in consultation with our community advisory stakeholders through a workshop. We describe

these stakeholders in a previous protocol (Blinded for Review). Our stakeholders include older women living with HIV and health and social care administrators.

**Step 2: Identifying relevant literature.** Following the guidelines recommended for ScRs and in consultation with an information specialist, we will develop an all-encompassing search strategy. In alignment with the review's objectives, a set of key terms and Medical Subject Headings (MeSH) will be incorporated into the search, specifically targeting the categories of 'aged,' HIV' and 'women'. The research strategy will be further refined through consultations with our stakeholders and research team (see [S1 File](#) for an example of a search strategy). The search will be limited to articles written or translated to English and human studies only. Stakeholders will be involved in the refinement of the search strategy, through virtual meetings to gather input and feedback. The final search strategy will be peer-reviewed following the PRESS guidelines [56]. We are proposing running the searches in the following databases: OVID Medline, Embase, PsychINFO, Emcare, and EBSCO CINAHL. We anticipate finalizing the search processes by June 2024. To ensure comprehensiveness, members of the research team will diligently review the reference lists of the studies that are included at the full text stage and actively seek input from stakeholders and experts to identify any additional relevant literature. All bibliographic information will be expertly managed using EndNote X8 [57], and systematic de-duplication will be executed according to the Bramer method for Endnote users [57]. Subsequently, records will be efficiently imported into Covidence, a web-based platform designed for screening and data extraction, streamlining the review process [58].

We will not include a search for grey literature in our review to maintain a streamlined focus on peer-reviewed, scientifically rigorous research sources, such that we can comment on the existing literature and make recommendations for future research.

**Step 3: Study selection.** We will include all peer-reviewed sources of quantitative, qualitative, mixed-method, or multimethod research, such that we are able to incorporate diverse types of evidence and research perspectives. To be eligible for inclusion, the participant sample of each study must consist of at least 50% older women aged 50 years and above who are living with HIV. Articles must focus on age-related experiences of the older women living with HIV participants. Articles must discuss either health related or social experiences. The participant sample must consist of at least 50% older women aged 50 years and above who are living with HIV. For mixed-gender studies to be included, they must present separate analyses or data specifically for older women in this demographic. In the context of HIV, health-related experiences will encompass the physical, mental, and emotional aspects of living with the virus or aging, including the management of symptoms, treatment adherence, and the impact on overall well-being. Social-related experiences involve the interactions, stigmatization, and support networks that individuals with HIV encounter, highlighting the influence of societal attitudes, disclosure, and access to social services on their lives. Due to resource constraints, only articles published in English will be included.

To ensure the consistency and reliability of the study selection process, two independent reviewers will apply the abovementioned pre-established inclusion criteria to all articles. Initially, the two reviewers will screen titles and abstracts to identify potentially relevant articles, followed by a thorough full-text review of the selected articles using the Covidence platform. Prior to the commencement of the screening process, all team members will meet to discuss the inclusion criteria and ensure the team is aligned in their understanding of the inclusion criteria. Additionally, weekly meetings will be conducted to address any ongoing concerns or uncertainties. In cases where there is a discrepancy or disagreement between the two reviewers during the selection process, consultation with a third team member will be initiated to facilitate a consensus decision.

**Step 4: Data extraction.** All studies and reports meeting the inclusion criteria will be systematically charted by two independent reviewers using the Covidence platform. To ensure consistency and reliability, a pilot of the data extraction form will be conducted on five randomly-selected studies. The articles will be selected using the random number generator in Microsoft Excel. The findings from this pilot process will be used to refine the data extraction form and ensure all relevant information is being captured consistently. Any discrepancies or challenges encountered during the pilot will be discussed among the research team, and the form will be revised as needed before proceeding with full data extraction on all included studies. As advocated by Arksey and O'Malley [46], the charting process is iterative, allowing for necessary form adjustments, which will be deliberated upon in consultation with the research team prior to extracting data from all included articles. The extracted data will encompass various elements, including publication type (e.g., journal article), study type (e.g., quantitative, qualitative, or mixed), study characteristics and settings, characteristics of the older women living with HIV (e.g., demographic [i.e., sex, gender, and other identity constructs [55]] and clinical attributes), including the intersections investigated (e.g., the specific intersections investigated in each study; e.g. race/ethnicity and gender), criteria and strategies employed for participant recruitment, results of the study, including how intersectionality was operationalized (e.g. use of interaction terms, stratification), the direction of any statistically significant intersectional inequality and how it was determined. To enhance the quality and accuracy of the data, a third reviewer will review and verify all extracted information. This comprehensive data collection process is anticipated to extend over a period of approximately 3 months.

**Step 5: Data synthesis and presentation of results.** The results of this review will be systematically presented in alignment with each research question. Each research question will be answered using a quantitative summary providing an overview of the quantity and types of included literature and a narrative synthesis that maps and interprets the findings. This narrative mapping will serve as the foundation for constructing the gaps and limitations in research (study question 3). Findings will be interpreted through an intersectional lens, highlighting how the intersection of multiple identities like race, gender, class shapes experiences in compounding ways that go beyond looking at these factors in isolation. The narrative synthesis will not only map the findings but also interpret them through an intersectional lens, highlighting how multiple identities intersect to shape experiences and outcome [59]. Where data is available, the analysis will aim to identify the influence of sex (biological attributes), gender (socially constructed roles) and other intersectional identities on experiences, and findings will be combined according to the intersections identified, for example, the intersection of race/ethnicity and genders. Results will be synthesized by mapping how different intersectional positions (e.g. Black women, low-income transgender women) are associated with disparities in experiences and outcomes related to living with HIV. All investigator members of the team, as well as representatives of the stakeholder advisory committee will be involved in discussing the final results and implications. Ongoing communication and scheduled meetings will facilitate this engagement. Regular consultations with stakeholders will be held monthly to review progress, discuss emerging findings, and provide feedback on data extraction and analysis. These consultations will take place through video conferences and email communications.

**Step 6: Consultation and knowledge translation.** We will encompass integrated knowledge transition (KT) and end-of-project KT strategies [60]. The research team will actively disseminate preliminary findings through presentations to local clinical and stakeholder audiences throughout the project, such that we can obtain preliminary feedback on themes. We will incorporate these findings into the preparation of a manuscript and subsequent conference presentation. The overarching goal of our KT plans are to create a strong evidential foundation that underpins the advancement of person-centered and integrated healthcare and



social service delivery for older women living with HIV. This objective is driven by the overarching aim of improving the overall well-being and quality of life for older women living with HIV.

## Discussion

This scoping review will employ a comprehensive and systematic approach to map the existing literature on the age-related experiences of older women living with HIV. By considering a wide range of study types we will ensure diversity in the types of evidence examined. Moreover, the review is theoretically informed by an SGBA+ lens, which emphasizes the significance of considering intersectionality in research. This approach allows for an in-depth examination of how sex, gender, and other identity factors influence the experiences of older women with HIV. The engagement of diverse stakeholder groups, including researchers, older women living with HIV, clinical professionals, and health and social service decision-makers, ensures that the research questions, methodology, and KT strategies are inclusive and reflect the real-world perspectives of those affected by HIV. However, the review is limited by its inclusion of only English-language peer-reviewed articles. Despite efforts to include a diverse range of literature, some experiences of older women living with HIV, particularly those from underrepresented backgrounds, may not be adequately addressed in the existing English-language peer-reviewed literature. This constraint may introduce a language bias, potentially excluding relevant studies published in other languages. Recognizing this limitation is crucial, as it may affect the comprehensiveness and generalizability of our findings. To mitigate this bias in future research, we recommend considering the inclusion of non-English studies with translation support. This approach could enhance the diversity and comprehensiveness of the evidence base, ensuring that valuable insights from non-English publications are not overlooked. Nonetheless, this review will serve as a critical step in recognizing the unique challenges and strengths of older women living with HIV, offering valuable insights for healthcare providers, policymakers, and researchers. Through ongoing collaborative efforts and KT, we aim to bridge the gap between research and practice, fostering positive change in the lives of diverse women affected by HIV at older age.

As this is a scoping review synthesizing data from previously published literature, no direct involvement of human participants took place. Therefore, participant informed consent was not applicable. All data extracted and analyzed during this scoping review will be made publicly available as supplemental files upon publication. The dataset will include the full list of included studies and their characteristics, as well as the extracted data on intersectional identities, inequalities, and other relevant findings.

## Conclusion

In conclusion, the forthcoming scoping review will address the critical gap in understanding the age-related experiences of older women living with HIV. Despite the increasing prevalence of HIV among this demographic, research on their psychosocial challenges and healthcare needs remains limited. By systematically mapping and synthesizing existing literature, we aim to illuminate the complex intersection of aging, gender, and HIV, offering insights into the unique challenges faced by older women living with HIV. Our theoretical framework rooted in Sex- and Gender-Based Analysis Plus (SGBA+) will ensure a nuanced examination of how social identities intersect to shape experiences. Through collaboration with diverse stakeholders and rigorous knowledge translation strategies, this scoping review protocol will inform a review that aims to inform evidence-based interventions, policies, and healthcare practices tailored to the needs of older women living with HIV. Ultimately, our efforts seek to improve the

overall well-being and quality of life for this marginalized population, fostering positive change in healthcare delivery and societal attitudes towards aging and HIV.

## Supporting information

**S1 Checklist. PRISMA-P (Preferred Reporting Items for Systematic review and Meta-Analysis Protocols) 2015 checklist: Recommended items to address in a systematic review protocol\*.**

(DOC)

**S1 File. Sample search strategy.**

(DOCX)

## Author Contributions

**Conceptualization:** Kristina Kokorelias.

**Methodology:** Kristina Kokorelias.

**Supervision:** Kristina Kokorelias.

**Writing – original draft:** Kristina Kokorelias.

**Writing – review & editing:** Paige Brown, Sharon Walmsley, Alice Zhabokritsky, Esther Su, Luxey Sirisegaram.

## References

1. Guaraldi G., Milic J., and Mussini C., Aging with HIV. *Current HIV/AIDS Reports*, 2019. 16: p. 475–481. <https://doi.org/10.1007/s11904-019-00464-3> PMID: 31823125
2. Emler C.A., Stigma in an aging context. *HIV and Aging*, 2017. 42: p. 144–158.
3. Grosso T.M., et al., Identifying the needs of older people living with HIV ( $\geq 50$  years old) from multiple centres over the world: a descriptive analysis. *AIDS Research and Therapy*, 2023. 20(1): p. 10.
4. Sangaramoorthy T., Jamison A., and Dyer T., Intersectional stigma among midlife and older Black women living with HIV. *Culture, health & sexuality*, 2017. 19(12): p. 1329–1343. <https://doi.org/10.1080/13691058.2017.1312530> PMID: 28418279
5. Durvasula R., HIV/AIDS in older women: unique challenges, unmet needs. *Behavioral Medicine*, 2014. 40(3): p. 85–98. <https://doi.org/10.1080/08964289.2014.893983> PMID: 25090361
6. HIV in Canada: 2021 surveillance highlights. 2022 [cited 2023 November 6]; Available from: <https://www.canada.ca/en/public-health/services/publications/diseases-conditions/hiv-2021-surveillance-highlights.html>.
7. Rubtsova A.A., et al., Healthy aging in older women living with HIV infection: a systematic review of psychosocial factors. *Current HIV/AIDS Reports*, 2017. 14: p. 17–30. <https://doi.org/10.1007/s11904-017-0347-y> PMID: 28194650
8. Cardoso S.W., et al., Aging with HIV: a practical review. *Brazilian Journal of Infectious Diseases*, 2013. 17: p. 464–479. <https://doi.org/10.1016/j.bjid.2012.11.007> PMID: 23711587
9. Wing E.J., HIV and aging. *International journal of infectious diseases*, 2016. 53: p. 61–68. <https://doi.org/10.1016/j.ijid.2016.10.004> PMID: 27756678
10. Kaplan-Lewis E., Aberg J.A., and Lee M.. Aging with HIV in the ART era. in *Seminars in diagnostic pathology*. 2017. Elsevier.
11. Effros R.B., et al., Workshop on HIV infection and aging: what is known and future research directions. *Clinical infectious diseases: an official publication of the Infectious Diseases Society of America*, 2008. 47(4): p. 542.
12. Alghanim S.A. and Alhamali R.M., Research productivity among faculty members at medical and health schools in Saudi Arabia. Prevalence, obstacles, and associated factors. *Saudi medical journal*, 2011. 32(12): p. 1297–303. PMID: 22159387



13. Santoro N., et al., Factors affecting reproductive hormones in HIV-infected, substance-using middle-aged women. *Menopause*, 2007. 14(5): p. 859–865. <https://doi.org/10.1097/GME.0b013e31802f7369> PMID: 17415019
14. Santoro N., et al., Women and HIV infection: the makings of a midlife crisis. *Maturitas*, 2009. 64(3): p. 160–164. <https://doi.org/10.1016/j.maturitas.2009.09.001> PMID: 19783389
15. Remien R.H., et al., Mental health and HIV/AIDS: the need for an integrated response. *AIDS (London, England)*, 2019. 33(9): p. 1411. <https://doi.org/10.1097/QAD.0000000000002227> PMID: 30950883
16. Rosenfeld D. and Anderson J., 'The own' and 'the wise' as social support for older people living with HIV in the United Kingdom. *Ageing & Society*, 2020. 40(1): p. 188–204.
17. Emler C.A., An examination of the social networks and social isolation in older and younger adults living with HIV/AIDS. *Health & social work*, 2006. 31(4): p. 299–308. <https://doi.org/10.1093/hsw/31.4.299> PMID: 17176977
18. Shippy R.A. and Karpiak S.E., Perceptions of support among older adults with HIV. *Research on aging*, 2005. 27(3): p. 290–306.
19. Shippy R.A. and Karpiak S.E., The aging HIV/AIDS population: fragile social networks. *Aging & mental health*, 2005. 9(3): p. 246–254. <https://doi.org/10.1080/13607860412331336850> PMID: 16019278
20. Emler C.A., et al., The impact of HIV-related stigma on older and younger adults living with HIV disease: does age matter? *AIDS care*, 2015. 27(4): p. 520–528. <https://doi.org/10.1080/09540121.2014.978734> PMID: 25397643
21. Brown M.J. and Adeagbo O., HIV and aging: double stigma. *Current epidemiology reports*, 2021. 8: p. 72–78. <https://doi.org/10.1007/s40471-021-00265-6> PMID: 33728256
22. Catalan J., et al., What influences quality of life in older people living with HIV? *AIDS research and therapy*, 2017. 14: p. 1–10.
23. Kteily-Hawa R., et al., Quality of life of older women living with HIV: comparative assessment of physical and mental health-related markers using a large Canadian Sexual and Reproductive Health Cohort Study. *HIV Research & Clinical Practice*, 2019. 20(2): p. 35–47. <https://doi.org/10.1080/15284336.2018.1554373> PMID: 31303141
24. Cowderly J.E. and Pesa J., Assessing quality of life in women living with HIV infection. *AIDS care*, 2002. 14(2): p. 235–245. <https://doi.org/10.1080/09540120220104730> PMID: 11940281
25. Chambers L.A., et al., Evidence informing the intersection of HIV, aging and health: a scoping review. *AIDS and Behavior*, 2014. 18: p. 661–675. <https://doi.org/10.1007/s10461-013-0627-5> PMID: 24185708
26. Geter A., Sutton M.Y., and Hubbard McCree D., Social and structural determinants of HIV treatment and care among black women living with HIV infection: a systematic review: 2005–2016. *AIDS care*, 2018. 30(4): p. 409–416. <https://doi.org/10.1080/09540121.2018.1426827> PMID: 29376409
27. Ho S.S. and Holloway A., The impact of HIV-related stigma on the lives of HIV-positive women: an integrated literature review. *Journal of clinical nursing*, 2016. 25(1–2): p. 8–19. <https://doi.org/10.1111/jocn.12938> PMID: 26234952
28. Cressman A.E., et al., The relationship between discrimination and missed HIV care appointments among women living with HIV. *AIDS and Behavior*, 2020. 24: p. 151–164. <https://doi.org/10.1007/s10461-019-02522-8> PMID: 31049811
29. Rice W.S., et al., Perceptions of intersectional stigma among diverse women living with HIV in the United States. *Social science & medicine*, 2018. 208: p. 9–17. <https://doi.org/10.1016/j.socscimed.2018.05.001> PMID: 29753137
30. Logie C.H., et al., HIV, gender, race, sexual orientation, and sex work: a qualitative study of intersectional stigma experienced by HIV-positive women in Ontario, Canada. *PLoS medicine*, 2011. 8(11): p. e1001124. <https://doi.org/10.1371/journal.pmed.1001124> PMID: 22131907
31. Logie C., et al., Associations between HIV-related stigma, racial discrimination, gender discrimination, and depression among HIV-positive African, Caribbean, and Black women in Ontario, Canada. *AIDS patient care and STDs*, 2013. 27(2): p. 114–122.
32. Bindura-Mutangadura G., HIV/AIDS, poverty, and elderly women in urban Zimbabwe. *Southern African Feminist Review*, 2001. 4(2/V. 5): p. 93.
33. Ward M.C., A different disease: HIV/AIDS and health care for women in poverty. *Culture, Medicine and Psychiatry*, 1993. 17: p. 413–430. <https://doi.org/10.1007/BF01379308> PMID: 8112085
34. Kriger D., et al., The operationalizing intersectionality framework. *Journal of clinical sport psychology*, 2022. 16(4): p. 302–324.
35. Ferree M.M., The discursive politics of feminist intersectionality, in *Framing intersectionality*. 2016, Routledge. p. 55–65.

36. Warner L.R. and Shields S.A., Intersectionality as a framework for theory and research in feminist psychology. *Gender, sex, and sexualities: Psychological perspectives*, 2018: p. 29–52.
37. Johnson Shen M., et al., The intersectionality of stigmas among key populations of older adults affected by HIV: a thematic analysis. *Clinical Gerontologist*, 2019. 42(2): p. 137–149. <https://doi.org/10.1080/07317115.2018.1456500> PMID: 29617194
38. Brennan-Ing M. and Emlet C., The Impact of Intersectional Identities on Older People With HIV. *Innovation in Aging*, 2020. 4(Supplement\_1): p. 723–723.
39. Cho S., Crenshaw K.W., and McCall L., Toward a field of intersectionality studies: Theory, applications, and praxis. *Signs: Journal of women in culture and society*, 2013. 38(4): p. 785–810.
40. Clark C., Matthew D., and Burns V., Power, privilege and justice: intersectionality as human rights? *The International Journal of Human Rights*, 2018. 22(1): p. 108–126.
41. Ramsay N.J., Intersectionality: A model for addressing the complexity of oppression and privilege. *Pastoral Psychology*, 2014. 63(4): p. 453–469.
42. Toth M., Messer L.C., and Quinlivan E.B., Barriers to HIV care for women of color living in the South-eastern US are associated with physical symptoms, social environment, and self-determination. *AIDS patient care and STDs*, 2013. 27(11): p. 613–620. <https://doi.org/10.1089/apc.2013.0030> PMID: 24138485
43. Sanders-Phillips K., Factors influencing HIV/AIDS in women of color. *Public Health Reports*, 2002. 117 (Suppl 1): p. S151. PMID: 12435839
44. Jackson-Best F. and Edwards N., Stigma and intersectionality: a systematic review of systematic reviews across HIV/AIDS, mental illness, and physical disability. *BMC public health*, 2018. 18(1): p. 1–19. <https://doi.org/10.1186/s12889-018-5861-3> PMID: 30049270
45. Tricco A.C., et al., A scoping review on the conduct and reporting of scoping reviews. *BMC medical research methodology*, 2016. 16: p. 1–10.
46. Arksey H. and O'Malley L., Scoping studies: towards a methodological framework. *International journal of social research methodology*, 2005. 8(1): p. 19–32.
47. Levac D., Colquhoun H., and O'Brien K.K., Scoping studies: advancing the methodology. *Implementation science*, 2010. 5: p. 1–9.
48. Colquhoun H.L., et al., Scoping reviews: time for clarity in definition, methods, and reporting. *Journal of clinical epidemiology*, 2014. 67(12): p. 1291–1294. <https://doi.org/10.1016/j.jclinepi.2014.03.013> PMID: 25034198
49. Peters M.D., et al., Updated methodological guidance for the conduct of scoping reviews. *JB1 evidence implementation*, 2021. 19(1): p. 3–10. <https://doi.org/10.1097/XEB.0000000000000277> PMID: 33570328
50. Tricco A.C., et al., PRISMA extension for scoping reviews (PRISMA-ScR): checklist and explanation. *Annals of internal medicine*, 2018. 169(7): p. 467–473. <https://doi.org/10.7326/M18-0850> PMID: 30178033
51. Kokorelias K.M., et al., Inclusion of older adults in digital health technologies to support hospital-to-home transitions: secondary analysis of a rapid review and equity-informed recommendations. *JMIR aging*, 2022. 5(2): p. e35925. <https://doi.org/10.2196/35925> PMID: 35475971
52. Doull M., et al., Appraising the evidence: applying sex-and gender-based analysis (SGBA) to Cochrane systematic reviews on cardiovascular diseases. *Journal of Women's Health*, 2010. 19(5): p. 997–1003. <https://doi.org/10.1089/jwh.2009.1626> PMID: 20384450
53. Canada H. Health Portfolio Sex- and Gender-Based Analysis Plus Policy: Advancing Equity, Diversity and Inclusion [Internet]. 2023; Available from: <https://www.canada.ca/en/health-canada/corporate/transparency/health-portfolio-sex-gender-based-analysis-policy.html>.
54. Wyndham-West M., Gender and dementia national strategy policymaking: Working toward health equity in Canada through gender-based analysis plus. *Dementia*, 2021. 20(5): p. 1664–1687. <https://doi.org/10.1177/1471301220964621> PMID: 33021810
55. Gahagan J. and Bryson M.K., Sex-and gender-based analysis in public health. 2021: Springer.
56. McGowan J., et al., PRESS peer review of electronic search strategies: 2015 guideline statement. *Journal of clinical epidemiology*, 2016. 75: p. 40–46.
57. Bramer W.M., et al., De-duplication of database search results for systematic reviews in EndNote. *Journal of the Medical Library Association: JMLA*, 2016. 104(3): p. 240. <https://doi.org/10.3163/1536-5050.104.3.014> PMID: 27366130
58. Babineau J., Product review: Covidence (systematic review software). *Journal of the Canadian Health Libraries Association/Journal de l'Association des bibliothèques de la santé du Canada*, 2014. 35(2): p. 68–71.

59. Ghasemi E., et al., Applying Intersectionality in designing and implementing health interventions: a scoping review. *BMC Public Health*, 2021. 21(1): p. 1–13.
60. Gagliardi A.R., et al., Integrated knowledge translation (IKT) in health care: a scoping review. *Implementation science*, 2015. 11(1): p. 1–12.
